# Supplementary material for: Nanoscale surface engineering of a high-k ZrO2/SiO2 gate insulator for a high performance ITZO TFT via plasma-enhanced atomic layer deposition
Source: Royal Society of Chemistry journal article supplement (doi:10.1039/d0tc02419h), 2020-01-01
Supplement: d0tc02419h1.pdf [file d0tc02419h1.pdf]

## Electronic Supplementary Information (ESI)

# Nanoscale surface engineering of a high- $k$ $\text{ZrO}_2/\text{SiO}_2$ gate insulator for high performance ITZO TFT via plasma-enhanced atomic layer deposition

*Wan-Ho Choi<sup>a</sup>, Woojin Jeon<sup>\*,b</sup> and Jin-Seong Park<sup>\*,a</sup>*

<sup>a</sup>Division of Materials Science and Engineering, Hanyang University, 222, Wangsimni-ro, Seongdong-gu, Seoul, 04763, Republic of Korea.

\*E-mail: jsparklime@hanyang.ac.kr

<sup>b</sup>Department of Advanced Materials Engineering for Information and Electronics, Kyung Hee University, 1732, Deogyong-daero, Giheung-gu, Yongin-si, Gyeonggi-do, 17104, Republic of Korea.

\*E-mail: woojin@khu.ac.kr

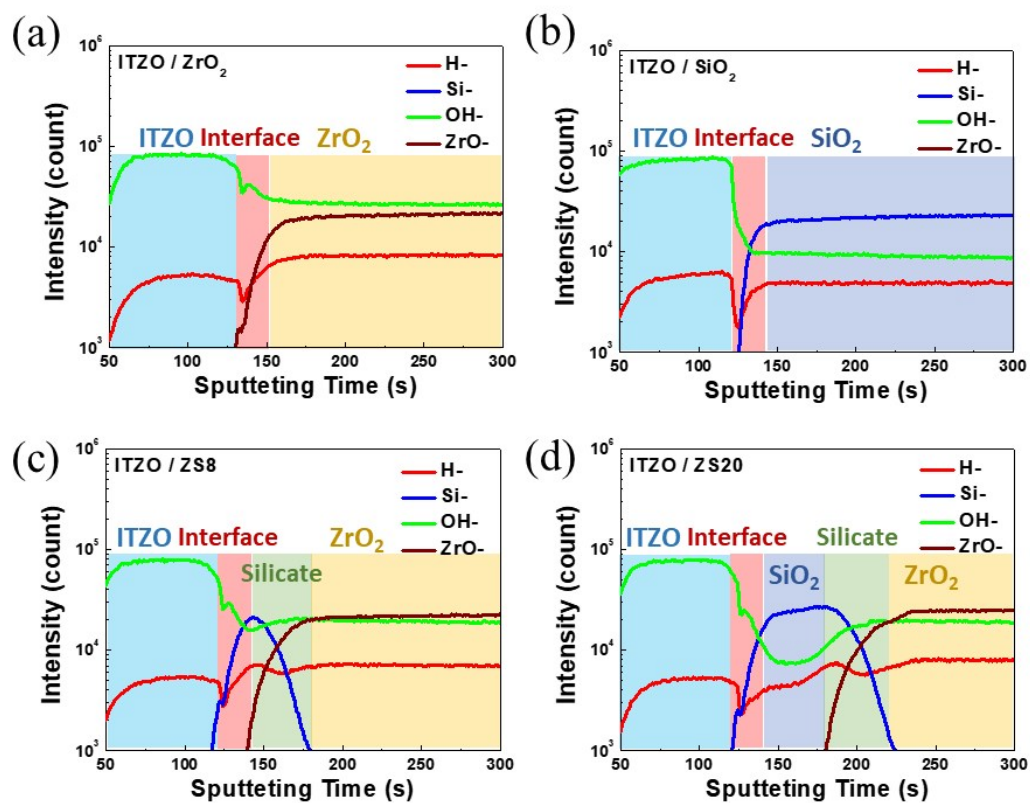

**Figure S1.** SIMS depth profile of TFT structure with (a) $ZrO_2$ , (b) $SiO_2$ , (c)ZS8 and (d)ZS20.
